## Regulation of cellular plasticity in *Drosophila* imaginal disc cells by the Polycomb group, trithorax group and *lama* genes

Ansgar Klebes, Anne Sustar, Katherina Kechris, Hao Li, Gerold Schubiger and Thomas B. Kornberg *Development* **132**, 3753-3765.

The wrong image was published in panel A of Fig. 4.

The correct figure is printed below.

The authors apologise to readers for this mistake.

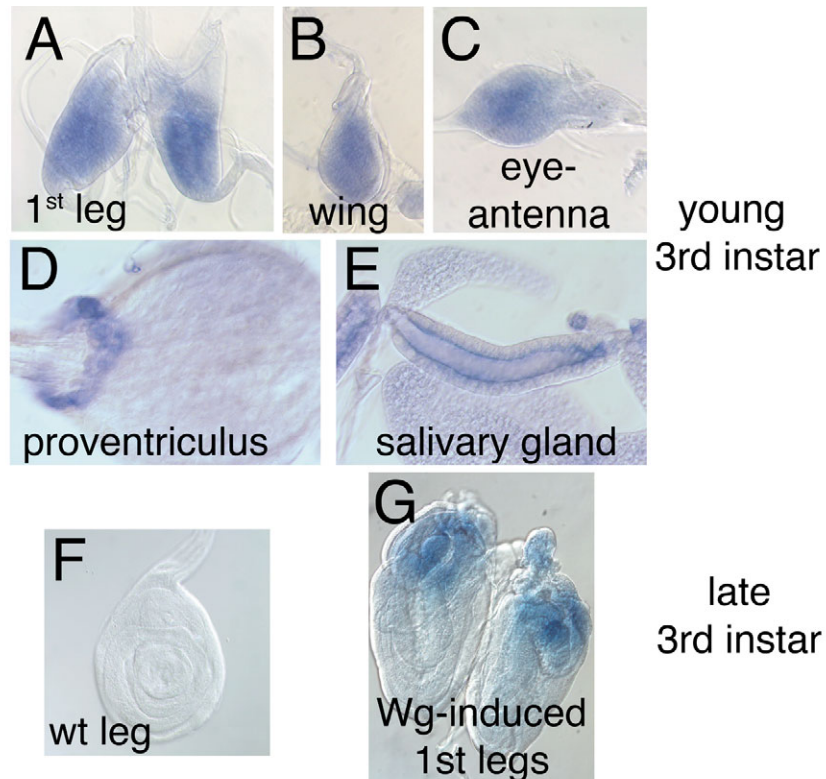

Source: https://cob.silverchair.com/dev/article-pdf/132/19/4419/1511322/4419.pdf
